# Supplementary material for: Whole Genome Sequencing of Field Isolates Provides Robust Characterization of Genetic Diversity in Plasmodium vivax
Source: PLoS Negl Trop Dis. 2012 Sep 6;6(9):e1811. doi: 10.1371/journal.pntd.0001811 (PMC3435244; doi:10.1371/journal.pntd.0001811)
Supplement: Table S1 — Characteristics of the patient samples included in the study. (PDF) [file pntd.0001811.s006.pdf]

**Supplemental Table S1.** Characteristics of the patient samples included in the study.

|                                 | <b>C08</b> | <b>C15</b>   | <b>C127</b> | <b>M08</b>       | <b>M19</b>       |
|---------------------------------|------------|--------------|-------------|------------------|------------------|
| Origin                          | Cambodia   | Cambodia     | Cambodia    | Madagascar       | Madagascar       |
| Collection Site                 | Pailin     | Takavit      | Takavit     | Ampasimpotsy-V13 | Ampasimpotsy-V13 |
| Date of Collection              | May 2011   | January 2011 | May 2011    | August 2010      | August 2010      |
| Patient's age                   | 20 years   | 20 years     | 14 years    | 3 years          | 3 years          |
| Patient's sex                   | Male       | Male         | Male        | Female           | Female           |
| Patient's temperature           | 37.2°C     | 39.0°C       | 40.0°C      | 37.6°C           | 37.7°C           |
| Parasitemia (parasite/ $\mu$ l) | ~20,000    | ~50,000      | ~20,000     | ~18,000          | ~8,000           |
